# Intron 3 Sixteen Base Pairs Duplication Polymorphism of *P53* Contributes to Breast Cancer Susceptibility: Evidence from Meta-Analysis

Dongmei Wu<sup>1,2,3</sup>, Zhizhong Zhang<sup>1,2,3</sup>, Haiyan Chu<sup>1,2</sup>, Ming Xu<sup>1,2</sup>, Yao Xue<sup>1,2</sup>, Haixia Zhu<sup>1,2,4</sup>, Zhengdong Zhang<sup>1,2\*</sup>

**1** Department of Environmental Genomics, Jiangsu Key Lab of Cancer Biomarkers, Prevention and Treatment, Cancer Center, Nanjing Medical University, Nanjing, China, **2** Department of Genetic Toxicology, the Key Laboratory of Modern Toxicology of Ministry of Education, School of Public Health, Nanjing Medical University, Nanjing, China, **3** Department of Neurology, Jinling Hospital, Nanjing University School of Medicine, Nanjing, China, **4** Core Laboratory, Nantong Cancer Hospital, Nantong, China

## Abstract

**Background:** *P53* is a tumor suppressor gene and plays important role in the etiology of breast cancer. Intron 3 sixteen-bp duplication polymorphism of *p53* has been reported to be associated with breast cancer risk. However, the reported results remain conflicting rather than conclusive.

**Methods:** A meta-analysis including 19 case-control studies was performed to address this issue. Odds ratios (ORs) with 95% confidence intervals (CIs) were adopted to evaluate the association.

**Results:** The overall results suggested that the variant genotypes were associated with a significantly increased breast cancer risk (Del/Ins vs Del/Del: OR = 1.18, 95% CI: 1.00–1.40; Ins/Ins vs Del/Del: OR = 1.42, 95% CI = 1.09–1.84; Ins/Ins+Del/Ins vs Del/Del: OR = 1.21, 95% CI = 1.03–1.41). When stratifying by sample size of studies, a significantly elevated risk was also observed among large sample studies (>500 subjects) but not among small sample studies (≤500 subjects).

**Conclusion:** These results suggested that the 16-bp duplication polymorphism of *p53* may contribute to susceptibility to breast cancer. Additional well-designed large studies were required to validate this association in different populations.

**Citation:** Wu D, Zhang Z, Chu H, Xu M, Xue Y, et al. (2013) Intron 3 Sixteen Base Pairs Duplication Polymorphism of *P53* Contributes to Breast Cancer Susceptibility: Evidence from Meta-Analysis. PLoS ONE 8(4): e61662. doi:10.1371/journal.pone.0061662

**Editor:** Gayle E. Woloschak, Northwestern University Feinberg School of Medicine, United States of America

**Received:** October 19, 2012; **Accepted:** March 12, 2013; **Published:** April 19, 2013

**Copyright:** © 2013 Wu et al. This is an open-access article distributed under the terms of the Creative Commons Attribution License, which permits unrestricted use, distribution, and reproduction in any medium, provided the original author and source are credited.

**Funding:** This study was partly supported by the National Natural Science Foundation of China (81230068, 30972444, and 81001274), the Key Program of Natural Science Foundation of Jiangsu Province (BK2010080), Natural Science Foundation of Jiangsu Province (BK2012842), the Program for Basic Research of Jiangsu Provincial Department of Education (12KJA330002), the Qin Lan Project of Jiangsu Provincial Department of Education, and the Priority Academic Program Development of Jiangsu Higher Education Institutions (Public Health and Preventive Medicine). The funders had no role in study design, data collection and analysis, decision to publish, or preparation of the manuscript.

**Competing Interests:** The authors have declared that no competing interests exist.

\* E-mail: drdzhang@gmail.com

These authors contributed equally to this work.

## Introduction

Breast cancer is the most commonly diagnosed cancer and a predominate cause of death in female population worldwide [1]. Although many risk factors for breast cancer have been identified, such as the genetic predisposition and estrogen level, the molecular mechanisms related to breast carcinogenesis remain under investigation [2,3].

The *p53* tumor suppressor gene, designated as the guardian of the genome, is the most frequently mutated gene in different types of cancers [4]. It is reported that the *p53* gene is mutated in 20%–30% of the sporadic breast cancer [5]. These mutations can affect the functions of *p53* protein as a transcription factor, and consequently many crucial functions such as DNA repair, cell cycle control, and apoptosis may be altered. Besides mutations, many single nucleotide polymorphisms (SNPs) have been identified in *p53* gene. The most informative one is the codon 72 Arg>Pro polymorphism (rs1042522), which results in structural

alteration of the *p53* protein and consequently affect its functions [6]. To date, the SNP rs1042522 has been found to be associated with risk of various cancers, including breast cancer, in different populations [7–9]. Moreover, the *p53* gene also contains several polymorphisms in non-coding region. Among these, the 16-bp duplication polymorphism (rs17878362) within intron 3 has been widely analyzed as possible cancer susceptibility modifiers (Figure 1). Gemignani *et al.* [10] found that the 16-bp Ins allele led to lower level of *p53* transcript, suggesting that this polymorphism causes an alteration in mRNA processing, which provides a possible molecular basis for the associated increased risk of developing cancer.

Over the last two decades, a number of case-control studies were conducted to investigate the association between the SNP rs17878362 and breast cancer risk. But these studies reported conflicting results. Since a single study might have been underpowered to detect the overall effects, a quantitative synthesis

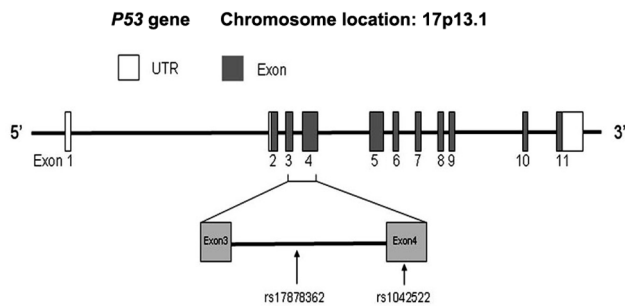

**Figure 1. Gene structure of *P53* gene and location of intron 3 16-bp duplication polymorphism (rs17878362).**  
doi:10.1371/journal.pone.0061662.g001

of the pooled data from different studies was deemed important to provide evidence for this association.

Thus, we carried out a meta-analysis on all eligible case-control studies to estimate the overall breast cancer risk of *p53* intron 3 duplication polymorphism as well as to quantify the between-study heterogeneity and potential bias.

## Materials and Methods

### Literature search and data extraction

To identify all studies that examined the association of *p53* intron 3 duplication polymorphism with breast cancer risk, we conducted a literature search of the PubMed and Embase database without a language limitation (the last search update was September 15, 2012, using the search terms “p53”, “polymorphism”, “variant”, and “breast cancer”). Review articles were hand-searched to find additional eligible studies and only published studies with full-text articles were included. Studies included in our meta-analysis have to meet the following criteria: (1) use a case-control design and (2) contain available genotype frequency. Major reasons for exclusion of studies were: (1) genotype frequency was not reported (2) duplicate of previous publication and (3) abstract, comment and review.

Information was carefully extracted from all eligible publications independently by two authors (D.W. and Z.Z.). For each included study, the following information was sought: the first author's last name, year of publication, country of origin, ethnicity, numbers of genotyped cases and controls, source of control groups (population- or hospital-based controls), genotyping methods, and quality control.

### Statistical analysis

For control group of each study, the allelic frequency was calculated and the observed genotype frequencies of the SNP rs17878362 were assessed for Hardy-Weinberg equilibrium using the  $\chi^2$  test. The strength of the association between the SNP rs17878362 and breast cancer risk was measured by odds ratios (ORs) with 95% confidence intervals (CIs). We first estimated the risks of the variant Ins/Del and Ins/Ins genotypes on breast cancer, compared with the wild-type Del/Del homozygote, and then evaluated the risks of (Ins/Ins+Ins/Del) vs Del/Del and Ins/Ins vs (Ins/Del+Del/Del) on breast cancer, assuming dominant and recessive effects of the variant Ins allele, respectively. Stratified analyses were also performed by ethnicity, source of controls and sample size ( $\leq 500$  and  $> 500$  subjects).

For the heterogeneity test, a fixed-effect model (the Mantel-Haenszel method) [11] was used when  $P > 0.05$ , otherwise a

random-effect model (the DerSimonian and Laird method) was used [12].

Cumulative meta-analysis were conducted to provide a framework for updating a genetic effect from all studies and to measure how much the genetic effect alters as evidence accumulates.

Sensitivity analyses were performed to assess the stability of the results, namely, a single study in the meta-analysis was deleted each time to reflect the influence of the individual data set to the pooled OR. Funnel plots and Egger's linear regression tests were used to provide diagnosis of the potential publication bias [13]. All analyses were done with Stata software (version 11.0; StataCorp LP, College Station, TX), using two-sided  $P$  values.

## Results

### Characteristics of studies

The flow chart in Figure 2 summarizes the process of study selection. A total of 19 studies were retrieved based on the search criteria [14–32]. Study characteristics are summarized in Table 1. Among the 19 eligible case-control studies, there were 4479 breast cancer cases and 4683 controls. For race distribution, there were 6 studies of Europeans, 4 studies of Asians and 1 study with Africans. Breast cancers were confirmed histologically or pathologically in most studies. A classic polymerase chain reaction-restriction fragment length polymorphism (PCR-RFLP) assay was adopted in 16 of the 19 studies, however, only 37% of the included studies mentioned quality control on genotyping, such as randomly repeated assays or validation using other genotyping methods. The genotype distributions among the controls of all studies were in agreement with Hardy-Weinberg equilibrium except for two study [14,31].

### Meta-analysis

Pooled ORs and heterogeneity test results for the association of SNP rs17878362 and breast cancer risk were shown in Table 2. Overall, there was evidence of an association between the variant genotypes and the increased breast cancer risk in different genetic models. As shown in Table 2, the variant genotypes (Del/Ins and Ins/Ins) were associated with a significantly increased risk of breast

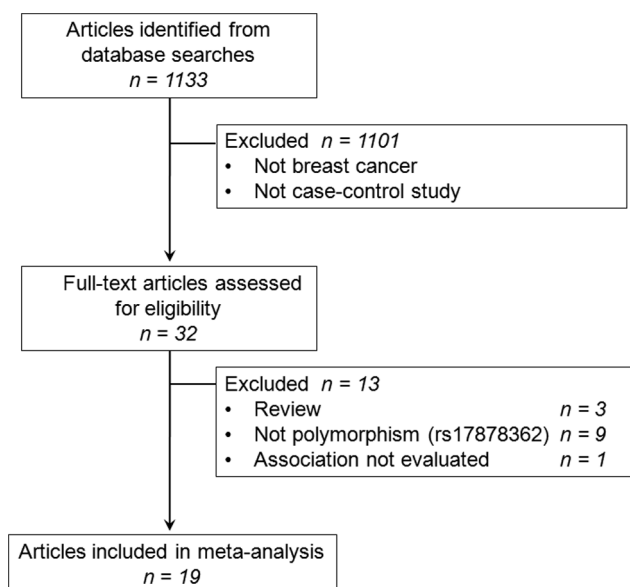

**Figure 2. Flow diagram of the literature search.**  
doi:10.1371/journal.pone.0061662.g002

**Table 1.** Main characteristics of selected studies.

| First author | Year | Country         | Ethnicity | Sample size case/control | Source of controls | Genotyping method | Matching |     |
|--------------|------|-----------------|-----------|--------------------------|--------------------|-------------------|----------|-----|
|              |      |                 |           |                          |                    |                   | Age      | Sex |
| Sjalander    | 1996 | Sweden          | —         | 212/689                  | Population         | PCR-RFLP          | Yes      | Yes |
| Weston       | 1997 | America         | European  | 65/117                   | Hospital           | PCR-RFLP          | Yes      | Yes |
| Wang-Gohrke  | 2002 | Germany         | —         | 563/549                  | Population         | PCR-RFLP          | Yes      | Yes |
| Suspitsin    | 2003 | Russia          | European  | 529/249                  | Hospital           | PCR-RFLP          | Yes      | Yes |
| Buyru        | 2007 | Turkey          | —         | 115/63                   | Population         | PCR-RFLP          | Yes      | Yes |
| Zhang        | 2007 | China           | Asian     | 83/167                   | Population         | PCR-RFLP          | Yes      | Yes |
| Cavallone    | 2008 | Canada          | European  | 157/112                  | Population         | Sequence          | -        | Yes |
| Costa        | 2008 | Portugal        | —         | 261/656                  | Hospital           | PCR-RFLP          | Yes      | Yes |
| Gaudet       | 2008 | America         | —         | 578/390                  | Population         | PCR-RFLP          | Yes      | Yes |
| De Vecchi    | 2008 | Italy           | —         | 350/352                  | Hospital           | PCR-RFLP          | -        | Yes |
| Akkiprik     | 2009 | Turkey          | European  | 97/107                   | Population         | AS-PCR            | Yes      | Yes |
| Hrstka       | 2009 | Czech           | —         | 117/108                  | Hospital           | PCR-RFLP          | Yes      | Yes |
| Ma           | 2009 | China           | Asian     | 117/123                  | Hospital           | PCR-RFLP          | Yes      | Yes |
| Bisof        | 2010 | Croatia         | —         | 95/108                   | Population         | Taqman            | Yes      | Yes |
| Trifa        | 2010 | Tunisia         | African   | 159/132                  | Population         | PCR-RFLP          | -        | Yes |
| Jakubowska   | 2010 | Poland          | European  | 311/287                  | Population         | PCR-RFLP          | Yes      | Yes |
| Alawadi      | 2010 | Syrians&Kuwaiti | Asian     | 229/133                  | Hospital           | PCR-RFLP          | Yes      | Yes |
| Faghani      | 2011 | Iran            | Asian     | 145/145                  | Population         | PCR-RFLP          | Yes      | Yes |
| Cherdyntseva | 2012 | Russia          | European  | 296/196                  | Population         | PCR-RFLP          | Yes      | Yes |

PCR-RFLP, polymerase chain reaction-restriction fragment length polymorphism; AS-PCR, allele specific- polymerase chain reaction.  
doi:10.1371/journal.pone.0061662.t001

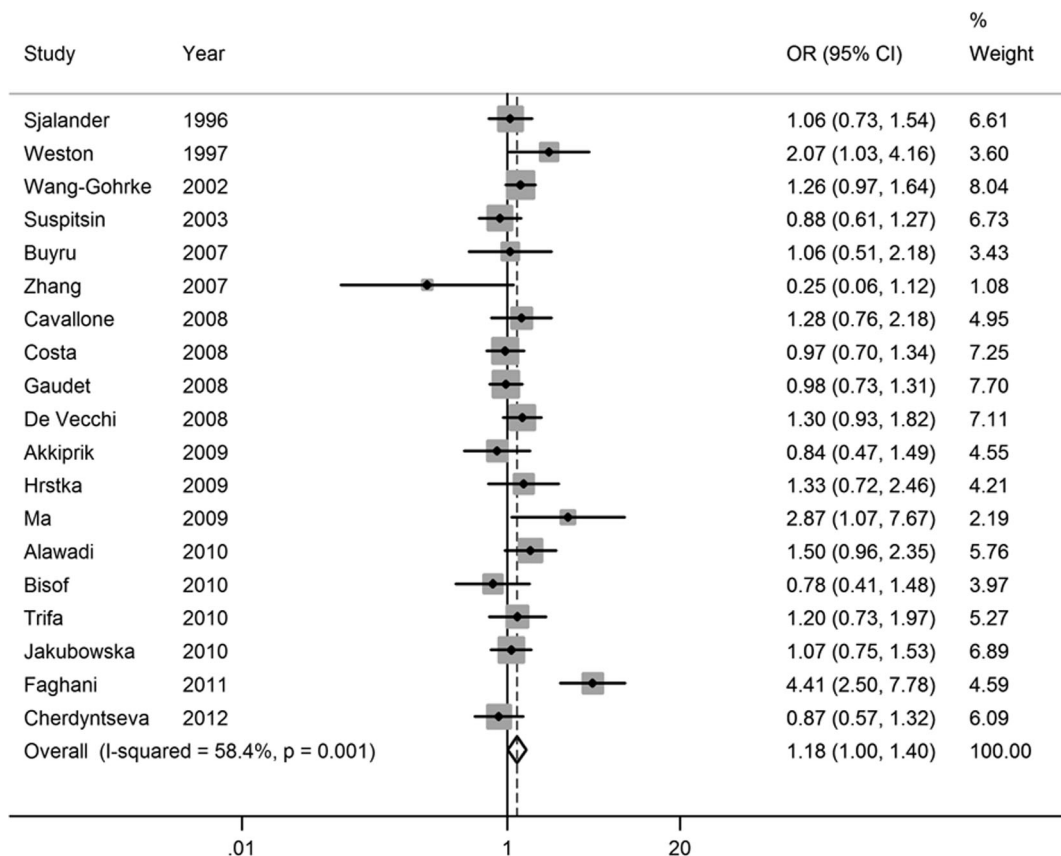

**Figure 3. Forest plot of breast cancer risk associated with the *p53* intron 3 16-bp duplication polymorphism (Del/Ins vs Del/Del).**  
doi:10.1371/journal.pone.0061662.g003

**Table 2.** Results of pooled ORs in the meta-analysis.

| Variables          | N <sup>a</sup> | Del/Ins vs. Del/Del |                | Ins/Ins vs. Del/Del |                | Ins/Ins+Del/Ins vs. Del/Del |                | Ins/Ins vs. Del/Del+Del/Ins |                |
|--------------------|----------------|---------------------|----------------|---------------------|----------------|-----------------------------|----------------|-----------------------------|----------------|
|                    |                | OR (95% CI)         | P <sup>b</sup> | OR (95% CI)         | P <sup>b</sup> | OR (95% CI)                 | P <sup>b</sup> | OR (95% CI)                 | P <sup>b</sup> |
| Total              | 19             | 1.18 (1.00–1.40)    | 0.001          | 1.42 (1.09–1.84)    | 0.079          | 1.21 (1.03–1.41)            | 0.001          | 1.28 (0.87–1.89)            | 0.038          |
| Ethnicities        |                |                     |                |                     |                |                             |                |                             |                |
| Asian              | 4              | 1.76 (0.73–4.28)    | 0.001          | 0.53 (0.23–1.23)    | -              | 1.67 (0.66–4.24)            | <0.001         | 0.43 (0.19–0.97)            | -              |
| European           | 6              | 1.04 (0.84–1.28)    | 0.273          | 1.07 (0.60–1.91)    | 0.699          | 1.05 (0.84–1.32)            | 0.172          | 1.09 (0.62–1.92)            | 0.774          |
| African            | 1              | 1.20 (0.73–1.97)    | -              | 0.88 (0.25–3.13)    | -              | 1.16 (0.72–1.88)            | -              | 0.82 (0.23–2.91)            | -              |
| Source of controls |                |                     |                |                     |                |                             |                |                             |                |
| Population-based   | 12             | 1.23 (0.90–1.41)    | 0.001          | 1.26 (0.88–1.81)    | 0.712          | 1.15 (0.92–1.43)            | 0.001          | 1.24 (0.86–1.77)            | 0.709          |
| Hospital-based     | 7              | 1.26 (0.99–1.61)    | 0.087          | 1.58 (0.75–3.34)    | 0.008          | 1.25 (1.07–1.46)            | 0.141          | 1.47 (0.66–3.31)            | 0.002          |
| Sample size        |                |                     |                |                     |                |                             |                |                             |                |
| ≤500               | 12             | 1.31 (0.95–1.80)    | <0.001         | 1.20 (0.74–1.95)    | 0.271          | 1.33 (0.98–1.81)            | <0.001         | 1.08 (0.67–1.75)            | 0.180          |
| >500               | 7              | 1.08 (0.96–1.22)    | 0.600          | 1.52 (1.11–2.08)    | 0.065          | 1.12 (0.99–1.26)            | 0.525          | 1.49 (1.10–2.03)            | 0.057          |

<sup>a</sup>Number of comparisons.<sup>b</sup>P value of Q-test for heterogeneity test. Random-effects model was used when P-value for heterogeneity test < 0.05; otherwise, fix-effects model was used.

doi:10.1371/journal.pone.0061662.t002

cancer in a dose-response manner compared with the wild-type Del/Del genotype (OR = 1.18, 95% CI: 1.00–1.40 for Del/Ins and 1.42, 1.09–1.84 for Ins/Ins;  $P_{\text{trend}} < 0.001$ ; Figure 3 and 4). In addition, significant main effects were also observed in dominant model (OR = 1.21, 95% CI = 1.03–1.41; Figure 5), but not in recessive model (OR = 1.28, 95% CI = 0.87–1.89; Figure 6). In the

stratified analysis by ethnicity, no significant associations were not observed for any genetic models (Table 2).

Then, these studies were further divided into two subgroups according to their source of controls. A statistically significantly elevated risk was only found among hospital-based studies in the dominant model (OR = 1.25, 95% CI = 1.07–1.46; Table 2).

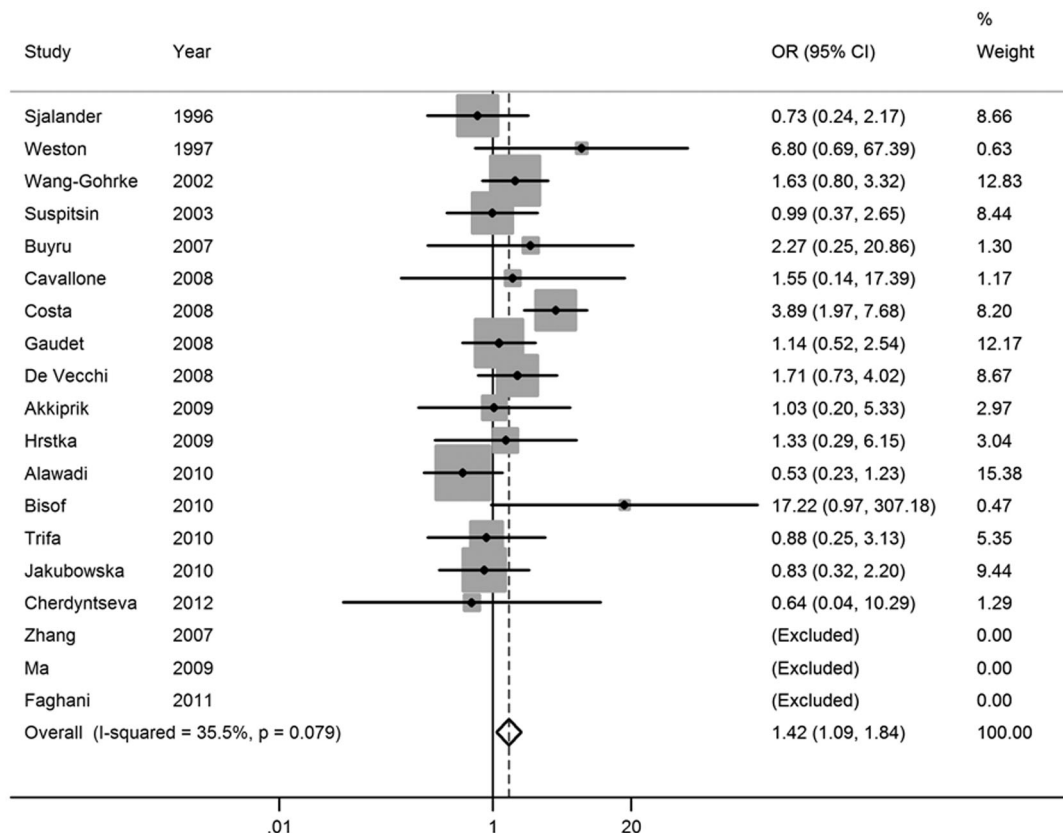**Figure 4.** Forest plot of breast cancer risk associated with the *p53* intron 3 16-bp duplication polymorphism (Ins/Ins vs Del/Del). doi:10.1371/journal.pone.0061662.g004

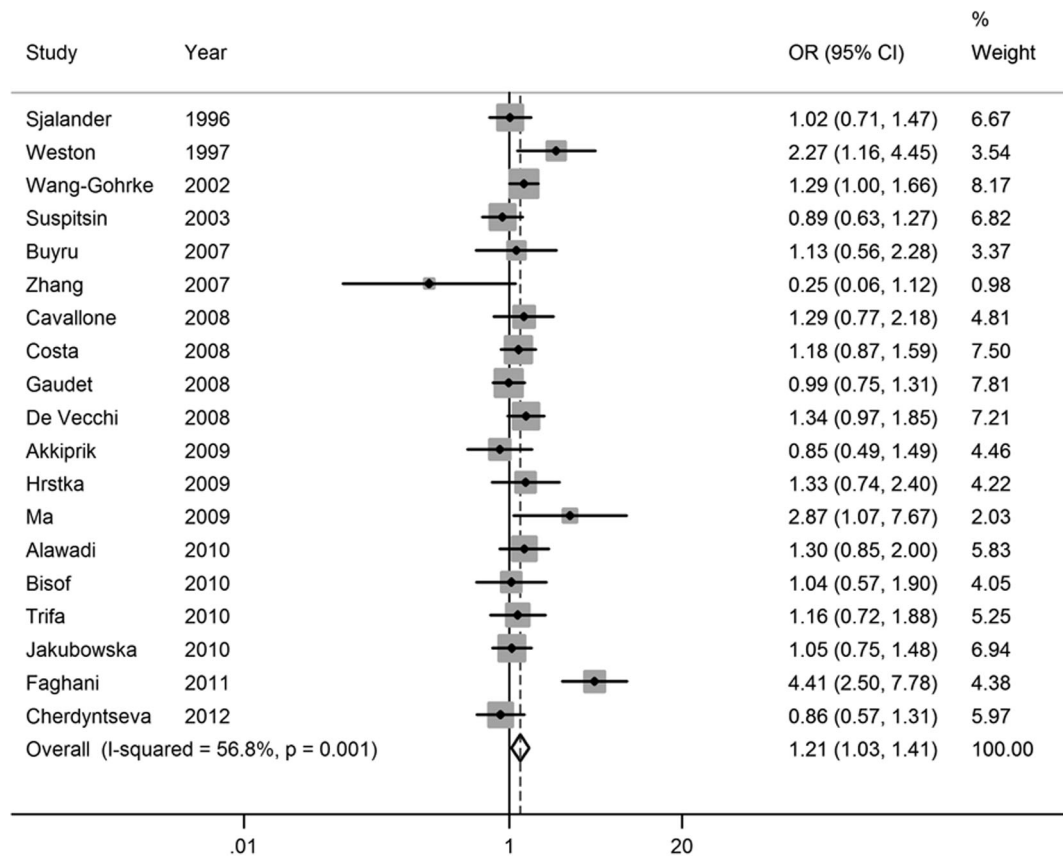

**Figure 5. Forest plot of breast cancer risk associated with the *p53* intron 3 16-bp duplication polymorphism (Ins/Ins+Del/Ins vs Del/Del).**

doi:10.1371/journal.pone.0061662.g005

When stratifying by sample size of studies, a significantly increased risk was also observed among large sample study ( $>500$  subjects) (homozygote model: OR = 1.52, 95% CI = 1.11–2.08; recessive model: OR = 1.49, 95% CI = 1.10–2.03) but not among small sample study ( $\leq 500$  subjects).

Beginning with the first published study we computed the cumulative pooled OR by stepwise addition of the results of the other available studies up to the last one published in March 2012. In the cumulative meta-analysis, the pooled OR achieved significance starting in 2009 ( $P=0.048$ ) and showed a trend of association as published data accumulated ( $P=0.017$ , Figure 7).

### Sensitivity analysis

The leave-one-out sensitivity analysis indicated that the study by Faghani et al. [31] was the main source of heterogeneity, exclusion of which effectively abrogated the heterogeneity (Ins/Ins vs Del/Del+Del/Ins:  $P=0.263$  for heterogeneity). Although the genotype distribution in two studies [14,31] did not follow Hardy-Weinberg equilibrium, the corresponding summary ORs were not substantially altered with or without including these studies (data not shown), indicating that the results of this meta-analysis were statistically robust.

### Publication bias

Funnel plots and Egger's tests were conducted to estimate the publication bias of literatures. The symmetry plots indicated that there was no publication bias in all pooled studies. The results were further confirmed by Egger's test ( $t=0.150$ ,  $P=0.882$  for Ins/Ins vs Del/Del; Figure 8).

### Discussion

Our present meta-analysis incorporating 19 case-control studies (4479 cases and 4683 controls) examined the association between a commonly studied 16-bp duplication polymorphism within intron 3 of *p53* gene and breast cancer risk. The results showed that, in overall, the variant Ins allele was associated with a significantly increased risk of breast cancer. Given the important role of *p53* in multiple cellular functions, such as DNA repair and apoptosis, it is biologically plausible that genetic variations of *p53* gene may modulate the risk of breast cancer.

It is reported that the 16-bp Ins allele was associated with lower level of *p53* transcript in lymphoblastoid cell lines, suggesting that this polymorphism causes an alteration in messenger RNA (mRNA) processing [10]. Moreover, the intron 3 16-bp duplication polymorphism was in strong linkage disequilibrium with the well-studied codon 72 variant and investigators have showed that a *P53* haplotype (codon 72 Arg/Pro, intron 6 G>A and intron 3 duplication) is associated with reduced apoptotic and DNA repair capacity in lymphoblastoid cell lines [33]. These experimental data indicate that the *P53* variants may affect *P53* function. Thus, it is reasonable that the 16-bp Ins allele might result in alteration of *p53* gene expression and function, leading to decrease of *p53* mediated apoptosis of tumor cells. In our present meta-analysis, we found that individuals with the 16-bp Ins allele were associated with higher risk of breast cancer than subjects with the Del allele, which was consistent with experimental findings.

Our results showed that the Ins allele may increase risk of breast cancer, which were consistent with a previous meta-analysis of

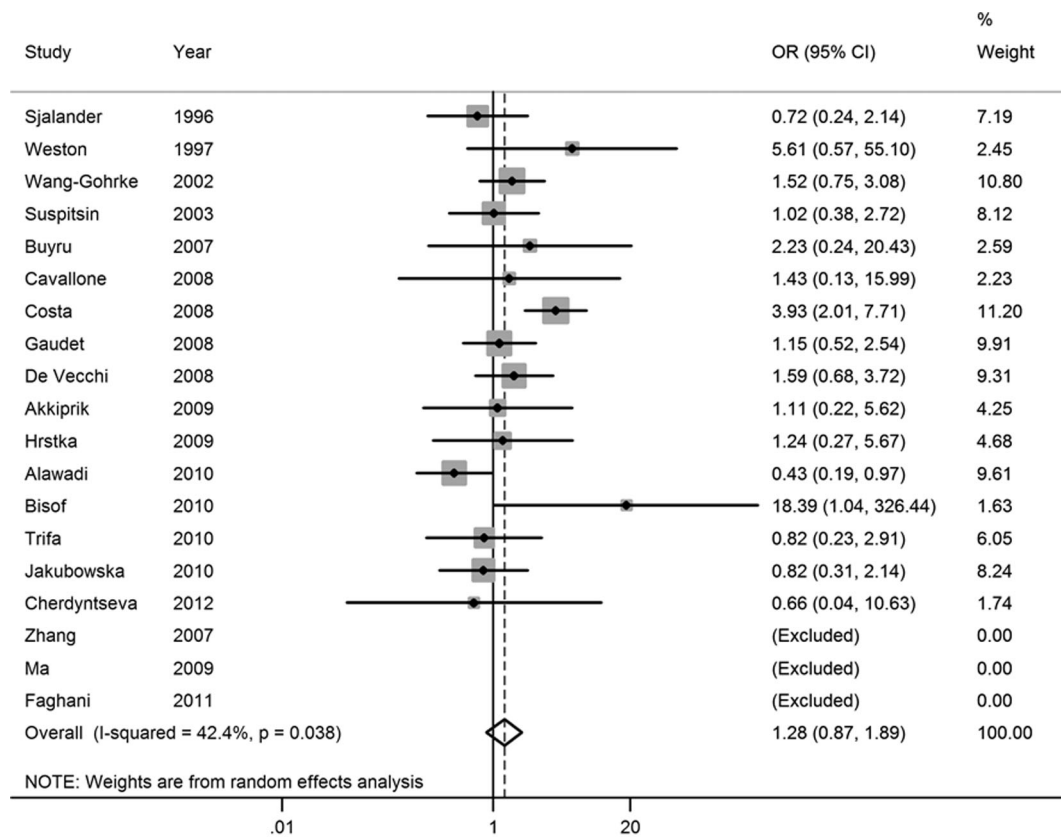

**Figure 6. Forest plot of breast cancer risk associated with the *p53* intron 3 16-bp duplication polymorphism (Ins/Ins vs Del/Del+Del/Ins).**

doi:10.1371/journal.pone.0061662.g006

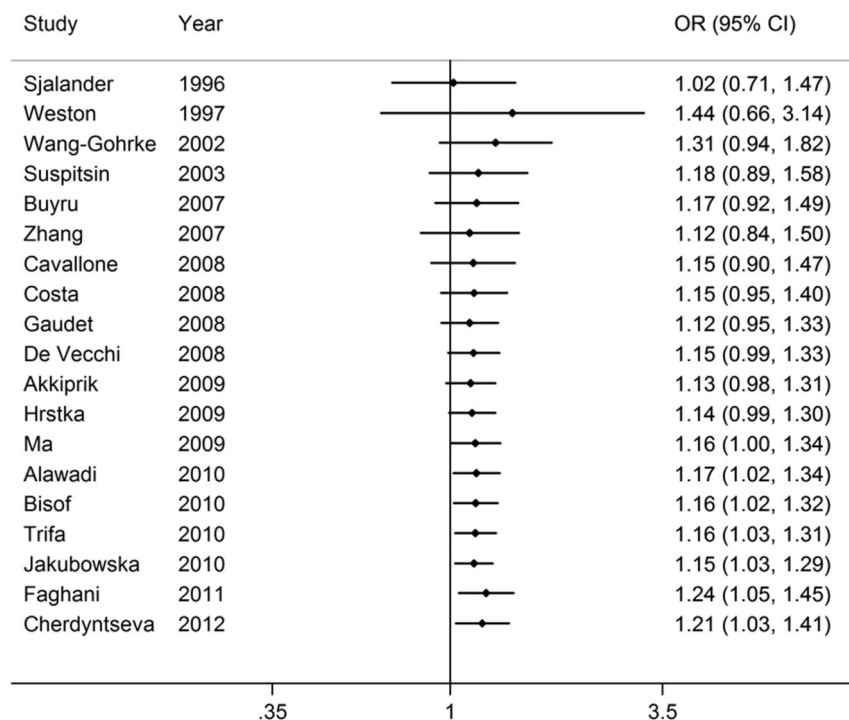

**Figure 7. Results of the cumulative meta-analysis (Ins/Ins+Del/Ins vs Del/Del).** The random effects pooled OR with 95% CI at the end of each information step is shown.

doi:10.1371/journal.pone.0061662.g007

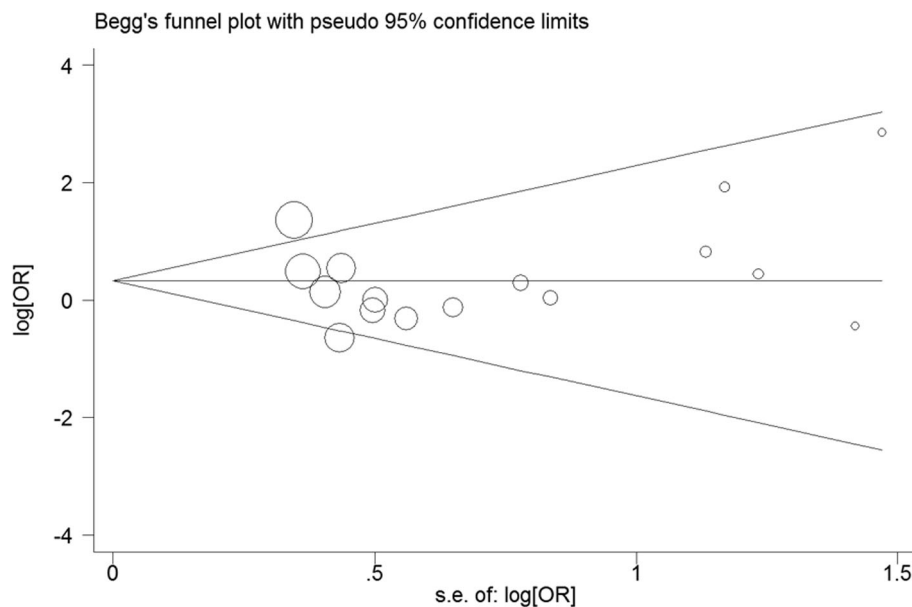

**Figure 8. Funnel plot for publication bias test (Ins/Ins vs Del/Del).**  
doi:10.1371/journal.pone.0061662.g008

eight studies based on breast cancer [34]. In the previous meta-analysis, however, the pooled sample size was relatively small and not enough information was available for more exhaustive subgroup analysis. Thereafter, several studies with a large sample size about this polymorphism on breast cancer risk have been reported, which would greatly improve the power of the meta-analysis of this polymorphism. Subgroup analyses performed by ethnicity, subject source, and sample size were also possible now. Thus, we updated this meta-analysis to derive a more precise estimation of these associations.

In our analysis, many studies did not provide the ethnic background of their participants, which precluded more detailed analysis of this polymorphism in different ethnicities. Thus, more specific ethnical information should be provided in further studies, which should lead to better understanding of the association between the 16-bp duplication polymorphism of p53 and breast cancer risk among different ethnicities.

We found an evidence for the association between the 16-bp Ins allele and breast cancer risk among large sample studies ( $>500$  subjects) but not among small sample studies ( $\leq 500$  subjects). This is probably because studies with small sample size may have limited statistical power to detect a small effect or may have generated a fluctuated risk estimate. Thus, the use of a proper and large sample study is very crucial in reducing biases in such association studies.

In this meta-analysis, a thorough sensitivity analysis was carried out by removing each single study from pooled data and the results showed that there was no influence of the individual data on overall results. Moreover, we also calculated the overall pooled ORs on 16-bp duplication with and without the two largest studies [16,21], and in both instances, found that the 16-bp Ins allele was associated with the increased risk of breast cancer.

Some limitations of this meta-analysis should be acknowledged. First, in the subgroup analyses, the number of Africans and Asians

was relatively small, not having enough statistical power to explore the real association. Second, misclassifications on disease status and genotypes may also influence the results, because cases in several studies were not confirmed by pathology, and the quality control of genotyping was also not well documented in several studies. In spite of these, our present meta-analysis also had some advantages. First, substantial number of cases and controls were pooled from different studies, which greatly increased statistical power of the analysis. Second, the quality of case-control studies included in this meta-analysis was satisfactory according to our selection criteria. Third, we did not detect any publication bias indicating that the whole pooled result should be unbiased.

Taken together, this meta-analysis provided evidence that the 16-bp duplication polymorphism within intron 3 of *p53* gene was significantly associated with an increased risk of breast cancer. Future well-designed large studies were warranted to validate these findings in different ethnic populations.

## Acknowledgments

We thank Dr Ute Hamann and his colleagues (German Cancer Research Center, Molecular Genetics of Breast Cancer, B055, Im Neuenheimer Feld 580, 69120 Heidelberg, Germany) for sharing the original data (gene frequency distribution) for *p53* intron 3 duplication polymorphism and breast cancer risk. Finally, we would like to thank the reviewer and the editor for their constructive comments on revising this manuscript.

## Author Contributions

Critical review of manuscript: HC YX Zhengdong Zhang. Conceived and designed the experiments: DW Zhizhong Zhang Zhengdong Zhang. Performed the experiments: hizhong Zhang HC HZ. Analyzed the data: DW HC. Contributed reagents/materials/analysis tools: DW MX YX HZ Zhengdong Zhang. Wrote the paper: DW Zhizhong Zhang.

## References

1. Parkin DM, Bray F, Ferlay J, Pisani P (2001) Estimating the world cancer burden: Globocan 2000. *Int J Cancer* 94: 153–156.
2. Yager JD, Davidson NE (2006) Estrogen carcinogenesis in breast cancer. *N Engl J Med* 354: 270–282.

3. Veronesi U, Boyle P, Goldhirsch A, Orecchia R, Viale G (2005) Breast cancer. *Lancet* 365: 1727–1741.
4. Hollstein M, Sidransky D, Vogelstein B, Harris CC (1991) p53 mutations in human cancers. *Science* 253: 49–53.
5. Hainaut P, Hollstein M (2000) p53 and human cancer: the first ten thousand mutations. *Adv Cancer Res* 77: 81–137.
6. Dumont P, Leu JI, Della Pietra AC 3rd, George DL, Murphy M (2003) The codon 72 polymorphic variants of p53 have markedly different apoptotic potential. *Nat Genet* 33: 357–365.
7. Klug SJ, Rensing M, Koenig J, Abba MC, Agorastos T, et al. (2009) TP53 codon 72 polymorphism and cervical cancer: a pooled analysis of individual data from 49 studies. *Lancet Oncol* 10: 772–784.
8. Yan L, Zhang D, Chen C, Mao Y, Xie Y, et al. (2009) TP53 Arg72Pro polymorphism and lung cancer risk: a meta-analysis. *Int J Cancer* 125: 2903–2911.
9. Zhang Z, Wang M, Wu D, Wang M, Tong N, et al. (2010) P53 codon 72 polymorphism contributes to breast cancer risk: a meta-analysis based on 39 case-control studies. *Breast Cancer Res Treat* 120: 509–517.
10. Gemignani F, Moreno V, Landi S, Moullan N, Chabrier A, et al. (2004) A TP53 polymorphism is associated with increased risk of colorectal cancer and with reduced levels of TP53 mRNA. *Oncogene* 23: 1954–1956.
11. Mantel N, Haenszel W (1959) Statistical aspects of the analysis of data from retrospective studies of disease. *J Natl Cancer Inst* 22: 719–748.
12. DerSimonian R, Laird N (1986) Meta-analysis in clinical trials. *Control Clin Trials* 7: 177–188.
13. Egger M, Davey Smith G, Schneider M, Minder C (1997) Bias in meta-analysis detected by a simple, graphical test. *Bmj* 315: 629–634.
14. Sjalander A, Birgander L, Hallmans G, Cajander S, Lenner P, et al. (1996) p53 polymorphisms and haplotypes in breast cancer. *Carcinogenesis* 17: 1313–1316.
15. Weston A, Pan CF, Ksieski HB, Wallenstein S, Berkowitz GS, et al. (1997) p53 haplotype determination in breast cancer. *Cancer Epidemiol Biomarkers Prev* 6: 105–112.
16. Wang-Gohrke S, Becher H, Kreienberg R, Runnebaum IB, Chang-Claude J (2002) Intron 3 16 bp duplication polymorphism of p53 is associated with an increased risk for breast cancer by the age of 50 years. *Pharmacogenetics* 12: 269–272.
17. Susptisin EN, Buslov KG, Grigoriev MY, Ishutkina JG, Ulibina JM, et al. (2003) Evidence against involvement of p53 polymorphism in breast cancer predisposition. *Int J Cancer* 103: 431–433.
18. Buyru N, Altinisik J, Demokan S, Dalay N (2007) p53 genotypes and haplotypes associated with risk of breast cancer. *Cancer Detect Prev* 31: 207–213.
19. Cavallone L, Arcand SL, Maugard C, Ghadirian P, Mes-Masson AM, et al. (2008) Haplotype analysis of TP53 polymorphisms, Arg72Pro and Ins16, in BRCA1 and BRCA2 mutation carriers of French Canadian descent. *BMC Cancer* 8: 96.
20. Costa S, Pinto D, Pereira D, Rodrigues H, Cameselle-Teijeiro J, et al. (2008) Importance of TP53 codon 72 and intron 3 duplication 16 bp polymorphisms in prediction of susceptibility on breast cancer. *BMC Cancer* 8: 32.
21. Gaudet MM, Gammon MD, Bensen JT, Sagiv SK, Shantakumar S, et al. (2008) Genetic variation of TP53, polycyclic aromatic hydrocarbon-related exposures, and breast cancer risk among women on Long Island, New York. *Breast Cancer Res Treat* 108: 93–99.
22. De Vecchi G, Verderio P, Pizzamiglio S, Manoukian S, Bernard L, et al. (2008) The p53 Arg72Pro and Ins16 bp polymorphisms and their haplotypes are not associated with breast cancer risk in BRCA-mutation negative familial cases. *Cancer Detect Prev* 32: 140–143.
23. Akkiprik M, Sonmez O, Gulluoglu BM, Caglar HB, Kaya H, et al. (2009) Analysis of p53 gene polymorphisms and protein over-expression in patients with breast cancer. *Pathol Oncol Res* 15: 359–368.
24. Hrstka R, Beranek M, Klocova K, Nenutil R, Vojtesek B (2009) Intronic polymorphisms in TP53 indicate lymph node metastasis in breast cancer. *Oncol Rep* 22: 1205–1211.
25. Trifa F, Karay-Chouayekh S, Mabrouk I, Baccouche S, Khahir A, et al. (2010) Haplotype analysis of p53 polymorphisms: Arg72Pro, Ins16 bp and G13964C in Tunisian patients with familial or sporadic breast cancer. *Cancer Epidemiol* 34: 184–188.
26. Jakubowska A, Gronwald J, Menkiszak J, Gorski B, Huzarski T, et al. (2009) BRCA1-associated breast and ovarian cancer risks in Poland: no association with commonly studied polymorphisms. *Breast Cancer Res Treat* 119: 201–211.
27. Zhang W, Jin MJ, Chen K (2007) [Association of p53 polymorphisms and its haplotypes with susceptibility of breast cancer]. *Zhejiang Da Xue Xue Bao Yi Xue Ban* 36: 561–566.
28. Alawadi S, Ghabreau L, Alsaleh M, Abdulaziz Z, Rafeek M, et al. (2011) P53 gene polymorphisms and breast cancer risk in Arab women. *Med Oncol* 28(3): 709–715.
29. Bisof V, Salihovic MP, Narancic NS, Skaric-Juric T, Jakic-Razumovic J, et al. (2010) TP53 gene polymorphisms and breast cancer in Croatian women: a pilot study. *Eur J Gynaecol Oncol* 31: 539–544.
30. Ma HL, Zhu M, Huang TS (2009) The p53<sup>PIN3</sup> gene polymorphism and susceptibility to breast cancer in Guizhou region women. *Chin J Lab Diagn* 13: 478–480.
31. Faghani M, Ghasemi FM, Nikhbakht M, Salehi M (2011) TP53 PIN3 polymorphism associated with breast cancer risk in Iranian women. *Indian J Cancer* 48: 298–302.
32. Cherdynseva NV, Denisov EV, Litviakov NV, Maksimov VN, Malinovskaya EA, et al. (2012) Crosstalk between the FGFR2 and TP53 genes in breast cancer: data from an association study and epistatic interaction analysis. *DNA Cell Biol* 31: 306–316.
33. Wu X, Zhao H, Amos CI, Shete S, Makan N, et al. (2002) p53 Genotypes and Haplotypes Associated With Lung Cancer Susceptibility and Ethnicity. *J Natl Cancer Inst* 94: 681–690.
34. Hu Z, Li X, Yuan R, Ring BZ, Su L (2010) Three common TP53 polymorphisms in susceptibility to breast cancer, evidence from meta-analysis. *Breast Cancer Res Treat* 120: 705–714.
